# Supplementary material
Source: Springer Nature journal article supplement (https://www.springermedizin.de/resource/supplementary/12943_2010_843_MOESM3_ESM.PDF/9551716)
Supplement: MOESM3 [file 9551716]

**Supplementary Table 3. Antigen retrieval method, recourse of antibody and developmental time in different studies**

| <b>Author</b> | <b>Antigen Retrieval Method</b>                                             | <b>Antibody</b>                                                                | <b>Development</b> |
|---------------|-----------------------------------------------------------------------------|--------------------------------------------------------------------------------|--------------------|
| Nalwoga H     | Tris–EDTA pH 9.0<br>microwaving<br>(750 W for 10 min)<br>(350 W for 20 min) | 6C9 60 min, RT                                                                 | 10 min             |
| Pietersen AM  | citrate buffer, Unknown                                                     | Millipore, F6, Anti-mouse 1:400                                                | Unknown            |
| Choi YJ       | citrate buffer, microwaving                                                 | Upstate Biotechnology Lake Placid, NY, USA                                     | 5 min              |
| Kim JH        | citrate buffer (pH=6.0), microwaving                                        | Upstate Biotechnology, Lake Placid, NY, USA<br>Anti-mouse 1:100, 90min, RT     | Unknown            |
| Arners JB     | Tris–EDTA pH 9.0, microwaving                                               | Upstate Biotechnology, Billerica, MA, USA<br>Clone F6, 1:800, overnight at 4°C |                    |
| Guo BH        | EDTA pH 8.0, microwaving                                                    | Upstate Biotechnology, Lake Placid, USA<br>clone F6, 1:100, overnight at 4°C   | 10 min             |
